# Supplementary material for: Phosphorylation-dependent modulation of CFTR macromolecular signalling complex activity by cigarette smoke condensate in airway epithelia
Source: PubMed Central journal article supplement (PMC6722123; doi:10.1038/s41598-019-48971-y), 2019-09-03
Supplement: 41598_2019_48971_MOESM1_ESM.pdf [file 41598_2019_48971_MOESM1_ESM.pdf]

## SUPPLEMENTARY MATERIALS

### Phosphorylation-dependent modulation of CFTR macromolecular signalling complex activity by cigarette smoke condensate in airway epithelia

Andrea Schnúr<sup>1</sup>, Aiswarya Premchandrar<sup>1</sup>, Miklos Bagdany<sup>1</sup> and Gergely L. Lukacs<sup>1,2,3</sup>

<sup>1</sup>Department of Physiology, McGill University, Montréal, Quebec, Canada.

<sup>2</sup>Department of Biochemistry, McGill University, Montréal, Quebec, Canada.

<sup>3</sup>Groupe de Recherche Axé sur la Structure des Protéines (GRASP), McGill University, Montréal, Quebec, Canada.

*\*Corresponding author:*

Gergely L. Lukacs,  
Department of Physiology  
McGill University  
3655 Sir-William-Osler  
Montreal, QC, Canada H3G 1Y6  
e-mail: [gergely.lukacs@mcgill.ca](mailto:gergely.lukacs@mcgill.ca)

## SUPPLEMENTARY METHODS

### Cell surface CFTR quantification

CFBE were treated (200 µg/ml CSC, DMSO, or 10 µM forskolin) in Krebs-Ringer Bicarbonate (KRB; 140 mM Na<sup>+</sup>, 120 mM Cl<sup>-</sup>, 5.2 mM K<sup>+</sup>, 25 mM HCO<sub>3</sub><sup>-</sup>, 2.4 mM HPO<sub>4</sub>, 0.4 mM H<sub>2</sub>PO<sub>4</sub>, 1.2 mM Ca<sup>2+</sup>, 1.2 mM Mg<sup>2+</sup> and 5 mM glucose, pH 7.4) buffer for 30 min at 37°C. After treatment, the cells were washed twice with PBS++ (PBS containing 1 mM MgCl<sub>2</sub> and 0.1 mM CaCl<sub>2</sub>) and blocked with PBS++-containing bovine serum albumin (0.5% BSA-PBS++) for 30 min. The primary anti-HA antibody and secondary HRP anti-mouse antibody (Jackson ImmunoResearch) incubation were done for an hour each on ice (1:1000 dilution), with four PBS++ washes between the two incubation steps. After eight washes with PBS++, the HRP activity was determined with the cell-impermeant Amplex Red HRP fluorogenic substrate (Invitrogen) at 544 nm excitation and 590 nm emission wavelengths using the TECAN fluorescence plate reader. Non-specific binding was determined using non-specific mouse IgG under the same experimental conditions.

For cell surface biotinylation, apical PM proteins of filter-grown cells were biotinylated on ice with 1 mg/ml EZ Link sulfo-NHS-SS-biotin (Thermo Fisher Scientific) for 15 min in buffer H (154 mM NaCl, 3 mM KCl, 10 mM Hepes, 1mM MgCl<sub>2</sub>, 0.1 mM CaCl<sub>2</sub>, 10 mM glucose, pH 7.8). Excess biotin reagent was washed off and quenched with 1% BSA-PBS++. Cells were then lysed in RIPA buffer (150 mM NaCl, 20 mM Tris-HCl, 1% Triton X-100, 0.1% SDS, and 0.5% sodium deoxycholate, pH 8.0) containing protease inhibitors (Leupeptin, Pepstatin A, phenylmethylsulfonyl fluoride). Biotinylated proteins were incubated with streptavidin-agarose beads (Invitrogen) or monomeric avidin magnetic beads (BcMag) at 4°C with rotation for an hour. Beads were washed three times with 1 ml RIPA buffer. Proteins were eluted from the beads with 5xLaemmli sample buffer (6.25% SDS, 250mM DTT, 150 mM Tris pH6.8, 20 mM EDTA, 0.875% glycerol, 0.017.5% BPB) supplemented with 6 mM biotin for 20 min at RT, separated by SDS-PAGE, and transferred onto a nitrocellulose membrane. Immunoblots were visualised with mouse anti-HA or Hsp90

antibodies and by HRP-conjugated anti-mouse antibodies (GE Healthcare). Densitometry analysis was performed with Image J.

### **Short circuit current measurement**

CFBE and NCI-H441 were grown on fibronectin-coated 12 mm Snapwell filters (Corning) for at least four days post-confluency. Inserts were mounted in Ussing chambers, bathed in KRB, maintained at 37°C, and bubbled continuously with 95% O<sub>2</sub> and 5% CO<sub>2</sub>. To functionally isolate the apical membrane, the basolateral side was permeabilised with amphotericin B (100 µM). To impose an apical-to-basolateral Cl gradient, NaCl and KCl in the apical bathing solution were replaced with Na<sup>+</sup> and K<sup>+</sup> gluconate, respectively. CR-HBE cells were seeded on Collagen IV-coated Snapwell filters, and during measurement, both apical and basolateral side was bathed in KRB. All measurements were performed under I<sub>sc</sub> conditions recorded with the Acquire and Analyze package (Physiologic Instruments, San Diego, CA), and expressed as current/cm<sup>2</sup>. In each experiment, amiloride (100 µM) and forskolin or CSC were added sequentially to the apical side followed by the addition of CFTR inhibitor (Inh-172; 20 µM) to demonstrate that measured currents were CFTR-specific. Each condition was measured in two technical replicates in every experiment. Transepithelial electrical resistance (TEER) was continuously monitored during the measurement and was >300 ohms\*cm<sup>2</sup>.

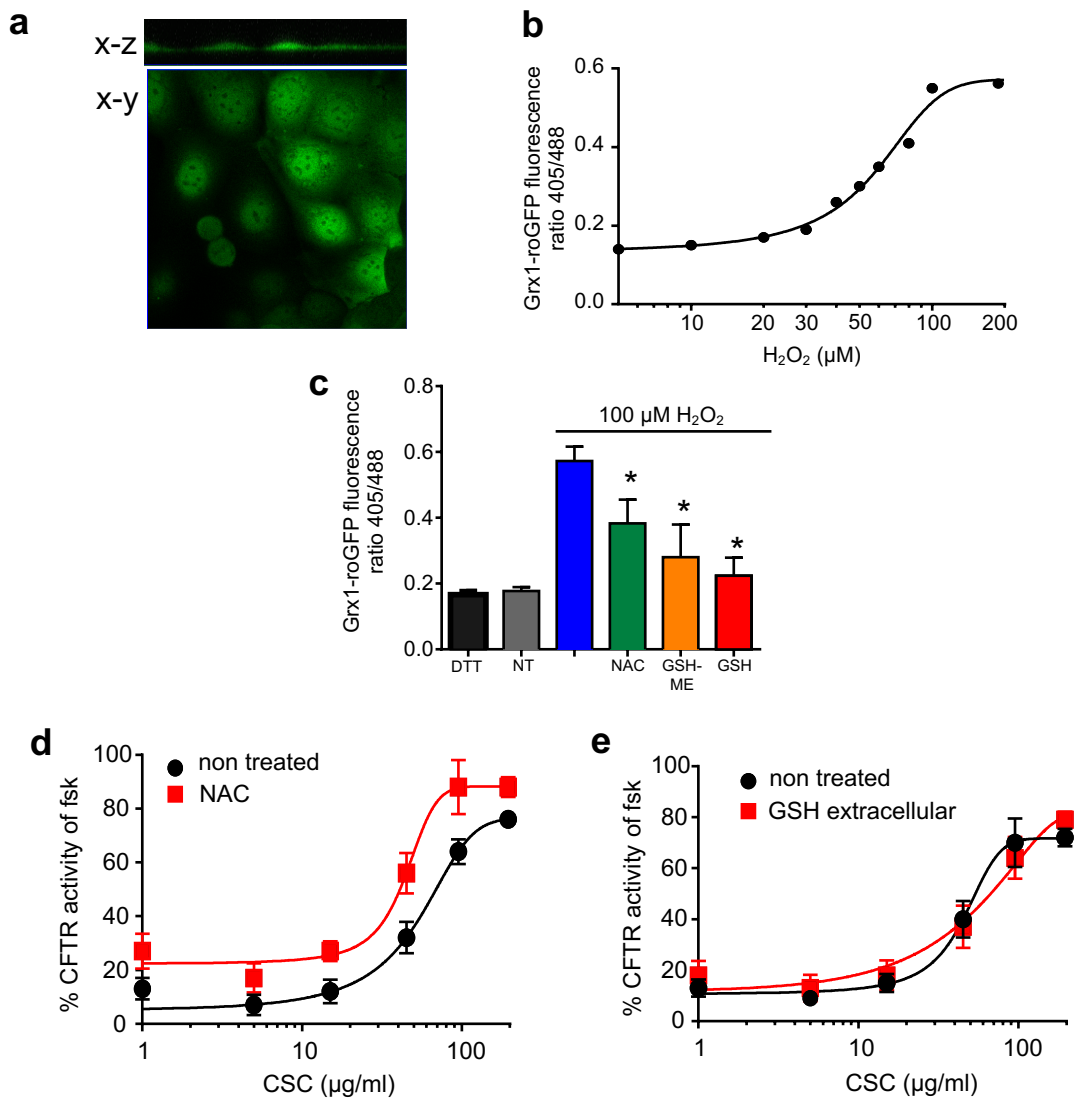

**Supplementary Fig. 1. The impact of reducing agents on the CSC-stimulated CFTR activation in CFBE.** **a)** Schematic representation and laser confocal images showing the cellular localization of human glutaredoxin-1 (Grx1)-fused redox-sensitive green fluorescent proteins (roGFP2) stably expressed in the inducible CFTR-expressing CFBE. Subcellular localization of the Grx1-roGFP was visualized by fluorescence microscopy. **b)** Grx1-roGFP2 protein-expressing CFBE were grown in black 96-well plates 5-6 days post-confluency. Cells were treated with the cell permeable-reducing agent 500 μM DTT, or varying hydrogen peroxide concentrations (10, 20, 30, 50, 100, 200 μM H<sub>2</sub>O<sub>2</sub>), a cell-permeable oxidizing agent. After 10 min, the cells were excited at 405 and 488 nm and the ratio of fluorescence emission was calculated and plotted. Higher ratio value represents a higher oxidative state. Data were acquired using a fluorescence plate reader as described in Methods and show one representative measurement. **c)** The 405/488 nm ratio values without treatment (NT), after 20 min 500 μM DTT treatment (DTT) or 10 min treatment with 100 μM H<sub>2</sub>O<sub>2</sub> with or without 4 h pre-treatment with 5 mM N-acetyl cysteine (NAC) or 1 mM glutathione monoethyl-ester (GSH-ME) or 10 min pre-treatment with 10 mM reduced L-glutathione (GSH). \**p*<0.05 *n*=3-6. **d)** Dose-response of CSC on CFBE with or without 4 h pre-treatment with 5mM NAC expressed as a percentage relative to maximal forskolin stimulation (254 ±20 μA/cm<sup>2</sup>) **e)** Dose-response of CSC on CFBE with or without 10 min of pre-treatment with 10 mM reduced L-GSH expressed as a percentage relative to maximal forskolin stimulation (244 ±24 μA/cm<sup>2</sup>).

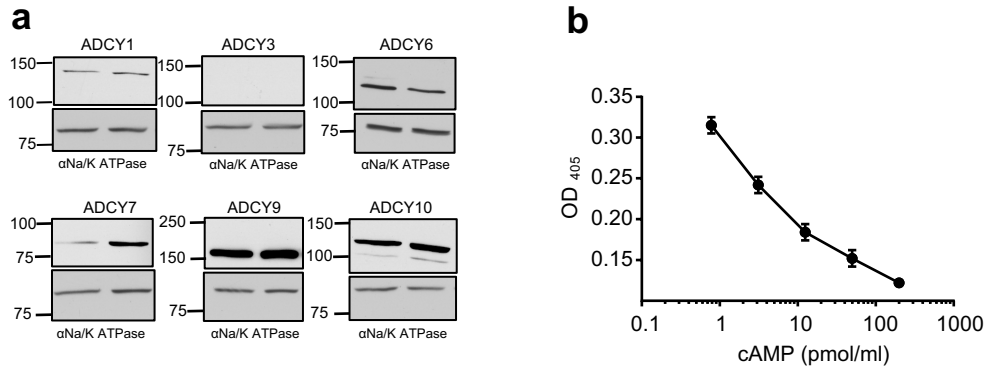

**Supplementary Fig. 2. a) The expression pattern of adenylyl cyclase (ADCY) isoforms in CFBE.** Immunoblot analysis of whole cell lysates of CFBE was performed to probe the expression of ADCY1, 3,6,7,9 and10. The  $\text{Na}^+/\text{K}^+$  ATPase was the loading control. **b) Calibration curve of the cAMP EIA assay.** Data are means  $\pm$ SEM, n=4-7.

### S422 –KTpSNGDDSLFFSNFSLLGTPVLKDINFK

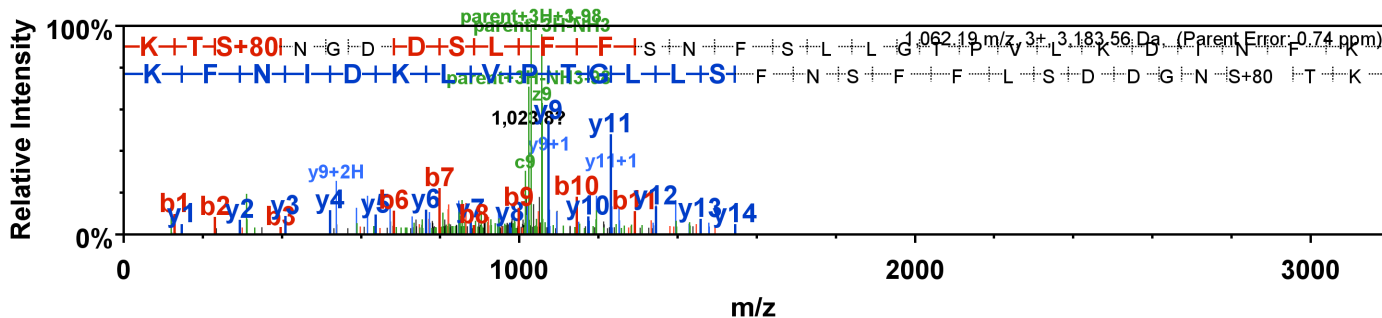

### S660 –RNpSILTETLHR

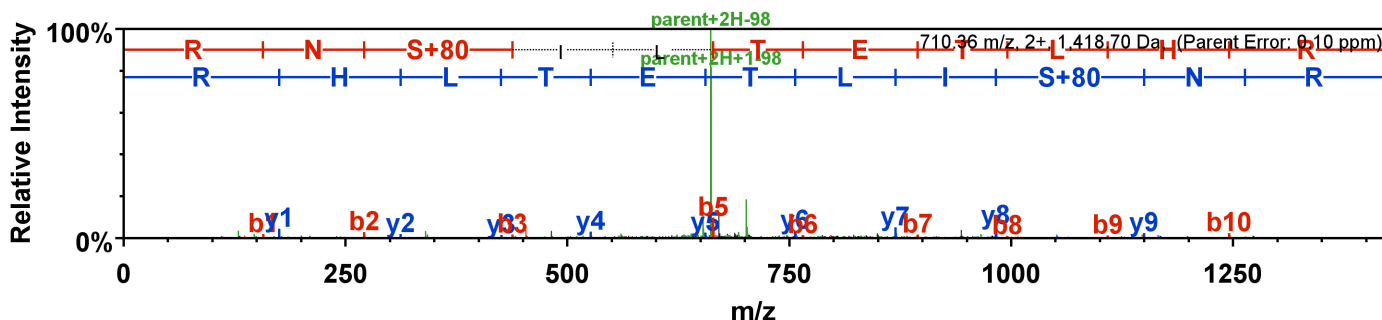

### S670 –NSILTETLHRFpSLEGDAPVSWTETK

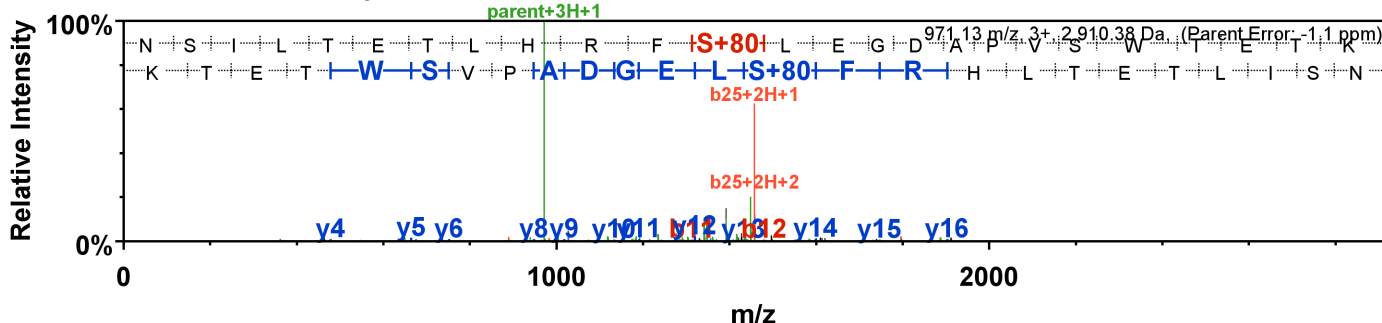

### S686 –KQpSFKQTGEFGEK

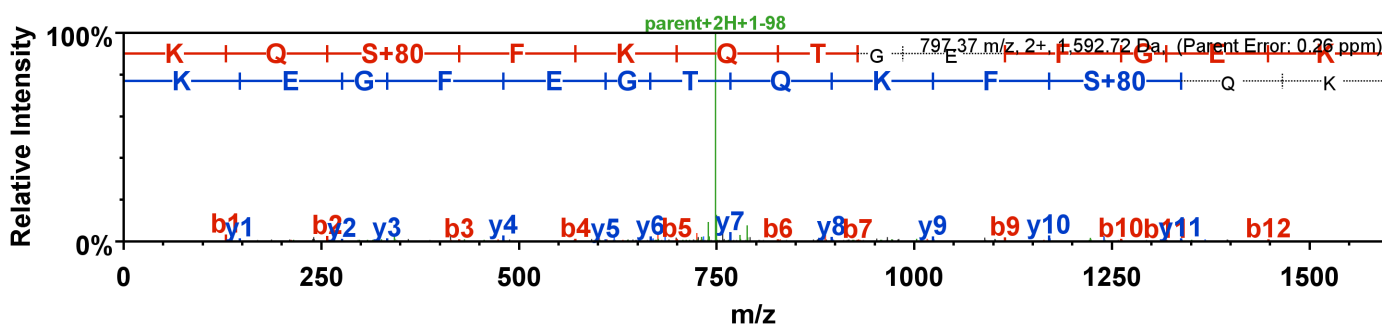

### S700 –KNpSILNPINSIR

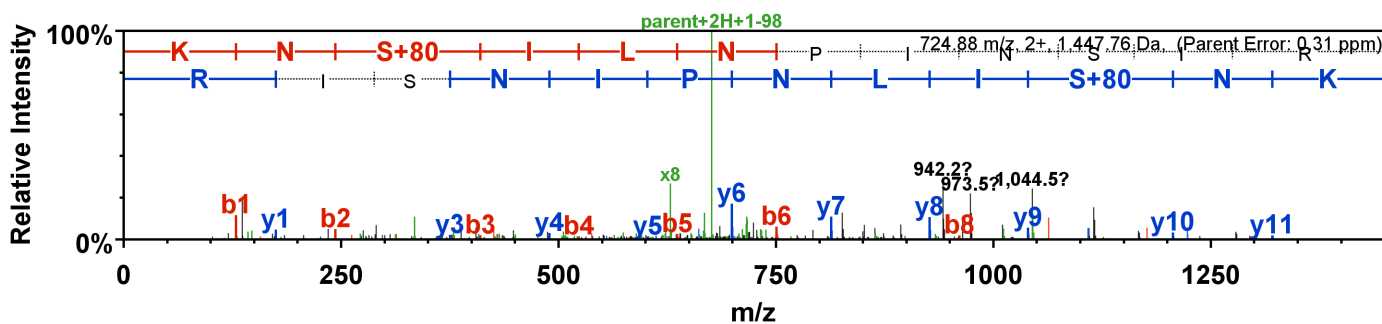

S712 –KFpSIVQK

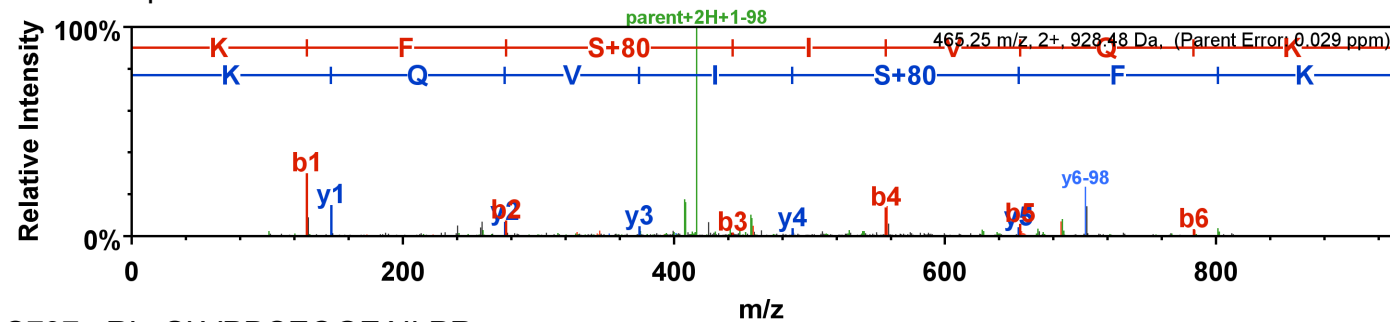

S737 –RLpSLVPDSEQGEAILPR

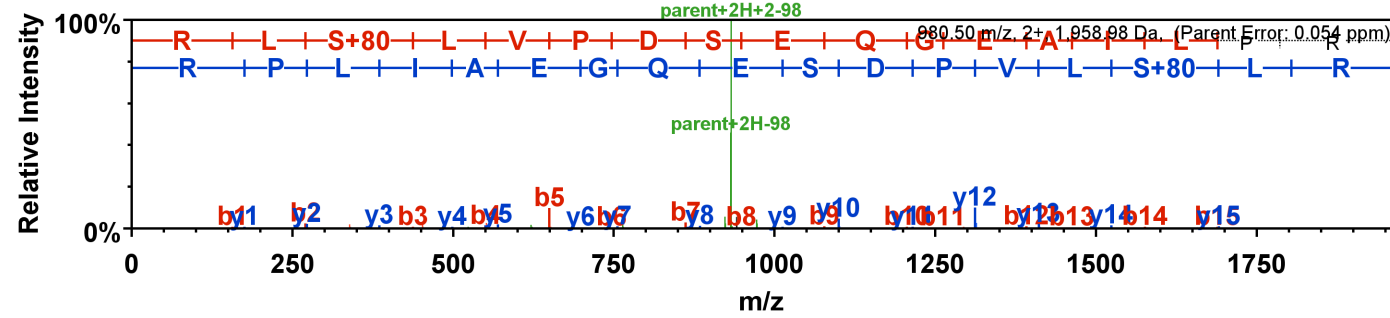

S753 –lpSVISTGPTLQAR

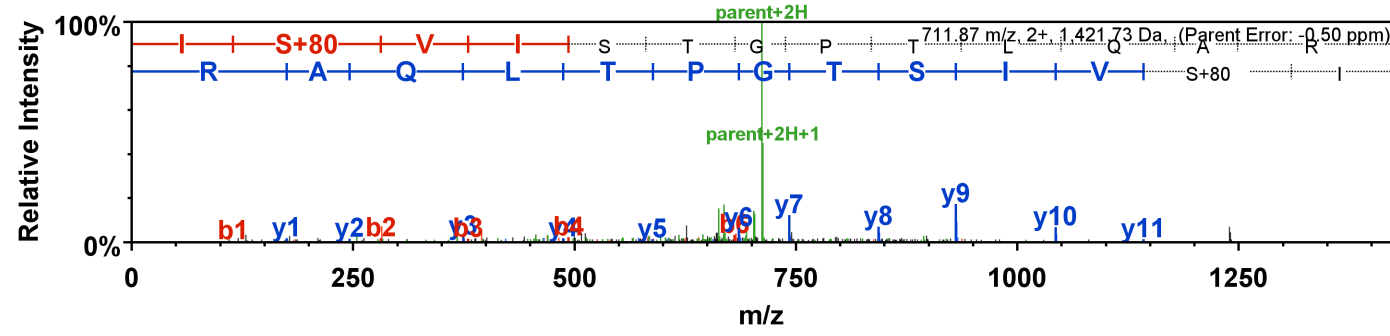

S768 –RQpSVLNLMTHSV NQGQNIHR

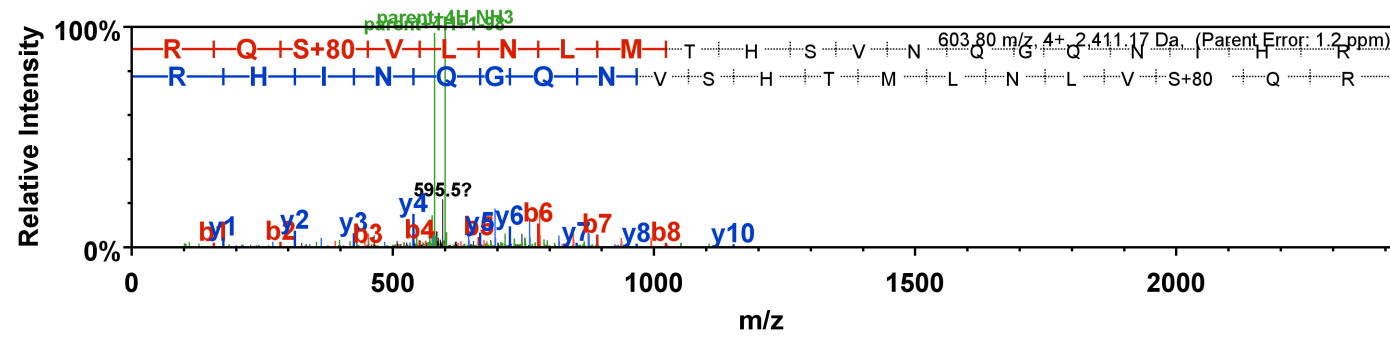

S795 –KVpSLAPQANLTELDIYSR

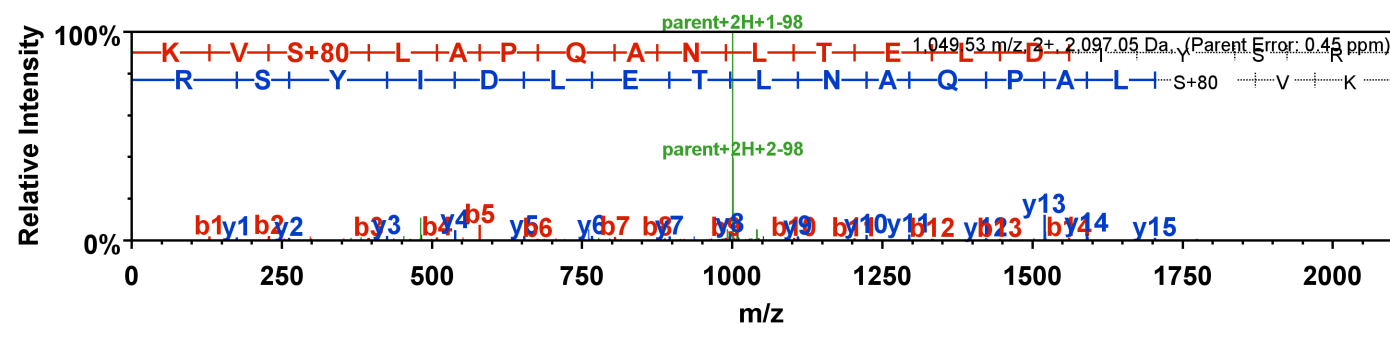

Supplementary Fig. 3.

S795 -KVpSLAPQANLTEDIYSR

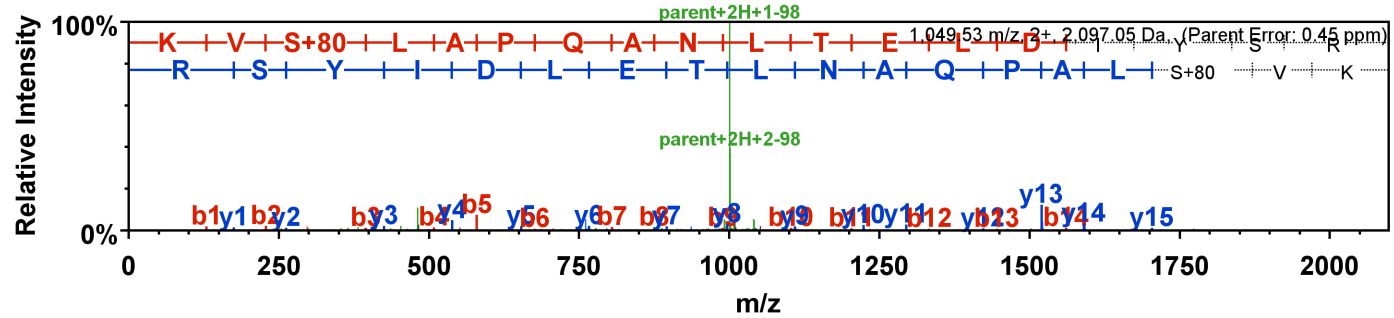

**Supplementary Fig. 3. Manual validation of MS<sup>n</sup> spectra using Scaffold software.** The confidence of phosphosite assignment was manually validated for all the phosphosite-containing peptides. The individual peptide-associated spectra from a representative peptide corresponding to each phosphosite is shown here.



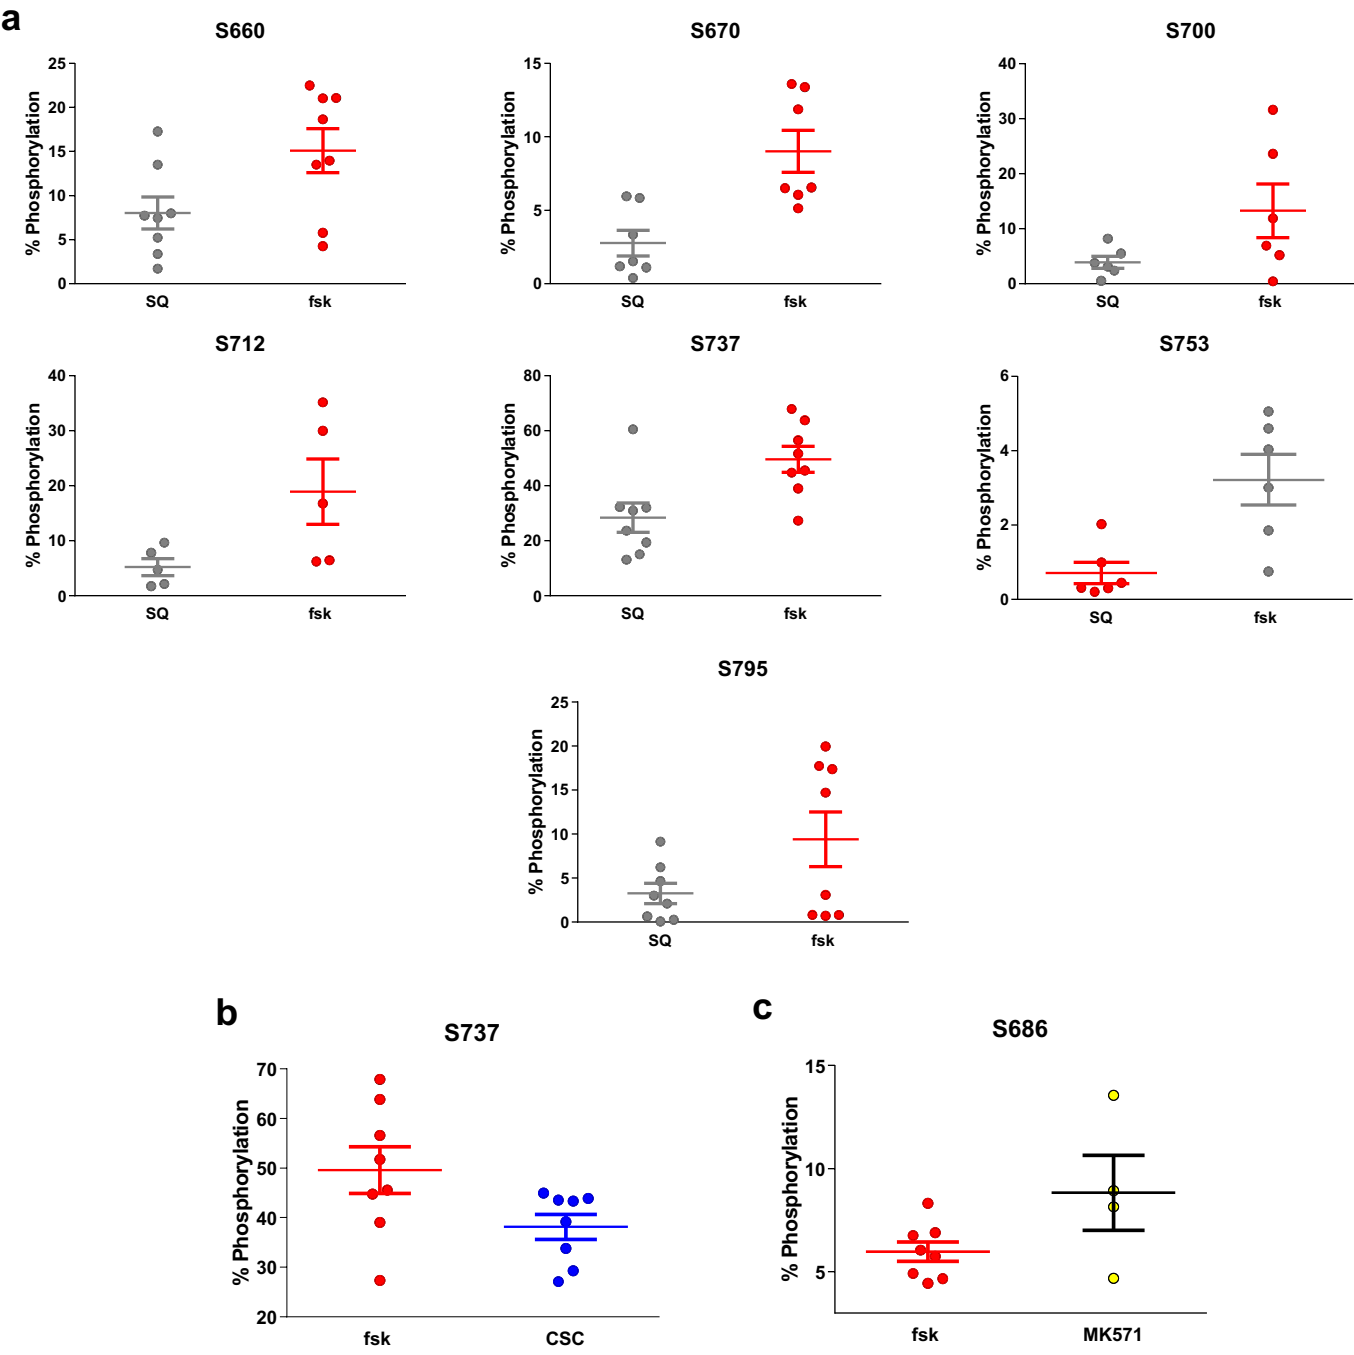

**Supplementary Fig.4. Scatter plots of individual phosphosites that show a significant difference in phospho-occupancy between two treatment conditions.** The horizontal line represents the mean of at least four biological replicates with the points representing the phospho-occupancy after 10  $\mu$ M forskolin (a), 200 $\mu$ g/mL CSC(b), or 50  $\mu$ M MK571 (c) exposure in each experiment. The error bars denote the standard error of the mean, n=5-8.

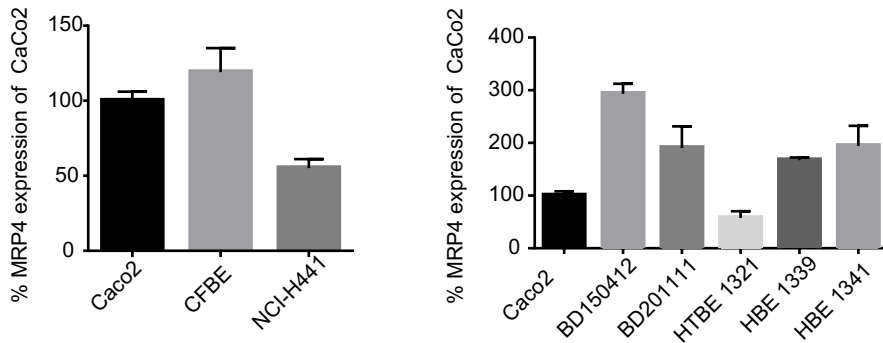

**Supplementary Fig.5. MRP4 mRNA expression detection by qPCR.** Quantitative PCR of MRP4 in immortalized airway epithelia (CFBE, NCI-H441) and CaCo-2 epithelia, as well as in primary CR-HBE<sup>WT/WT</sup> cells, obtained from 5 individuals. CaCo-2 epithelia was used as a reference for MRP4 transcript level.

| Region of CFTR | Site | A-score (mean $\pm$ SEM) | <i>In vitro</i>                                          | <i>In vivo</i>                                    |
|----------------|------|--------------------------|----------------------------------------------------------|---------------------------------------------------|
| NBD1           | S422 | 19 $\pm$ 3               | 25330774, 8880910                                        |                                                   |
| RD             | S660 | 61 $\pm$ 2               | 1377674, 15657296, 1716180<br>25330774, 1716180, 8880910 | 9385646, 15657296, 25330774,<br>1716180, 22119790 |
|                | S670 | 36 $\pm$ 4               | 15657296, 25330774                                       | 25330774                                          |
|                | S686 | 71 $\pm$ 3               |                                                          | 22119790                                          |
|                | S700 | 135 $\pm$ 12             | 1377674, 15657296, 25330774,<br>1716180, 8880910         | 9385646, 15657296, 25330774,<br>22119790          |
|                | S712 | 1000 $\pm$ 0             | 25330774, 1716180, 8880910                               | 9385646, 15657296, 25330774,<br>22119790          |
|                | S737 | 117 $\pm$ 2              | 1377674, 15657296, 1716180,<br>25330774, 8880910         | 9385646, 15657296, 25330774,<br>1716180, 22119790 |
|                | S753 | 61 $\pm$ 9               | 15657296, 25330774                                       | 9385646                                           |
|                | S768 | 64 $\pm$ 8               | 1377674, 15657296, 25330774,<br>1716180, 8880910         | 9385646, 15657296                                 |
|                | S795 | 169 $\pm$ 3              | 1377674, 15657296, 1716180,<br>25330774, 8880910         | 9385646, 15657296, 25330774,<br>1716180, 22119790 |

**Supplementary Table 1. Identified PKA-consensus sites in the RD and NBD1 of CFTR.** The PMIDs of the publications that identified and characterised these sites either *in vitro* or *in vivo* are indicated.
